# Supplementary material for: Silencing of retrotransposon-derived imprinted gene RTL1 is the main cause for postimplantational failures in mammalian cloning
Source: PubMed Central journal article supplement — Proc Natl Acad Sci U S A. 2018 Oct 31;115(47):E11071–80. doi: 10.1073/pnas.1814514115 (PMC6255163; doi:10.1073/pnas.1814514115), 2018-10-31
Supplement: pnas.1814514115.sapp.pdf [file pnas.1814514115.sapp.pdf]

Supplemental Information (SI) for

**Silencing of Retrotransposon-derived Imprinted Gene *RTL1* is the Main Cause for  
Post-implantational Failures in Mammalian Cloning**

**This PDF file includes:**

Figs. S1 to S16

Table S1

Figure S1

A

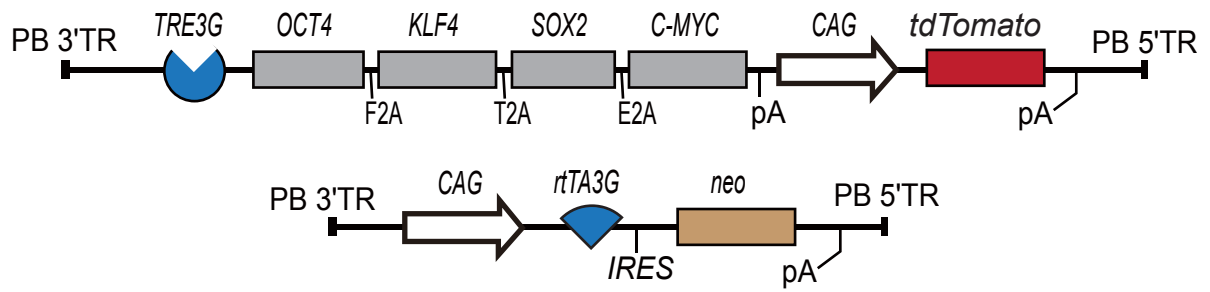

B

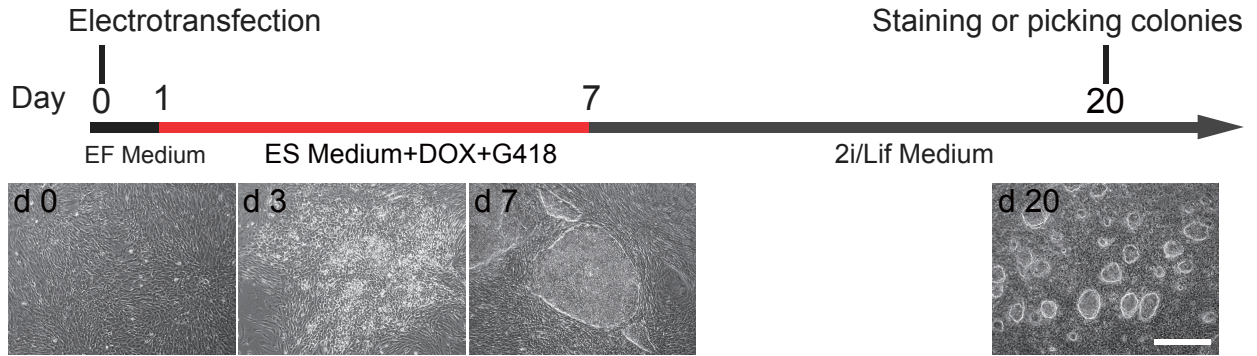

C

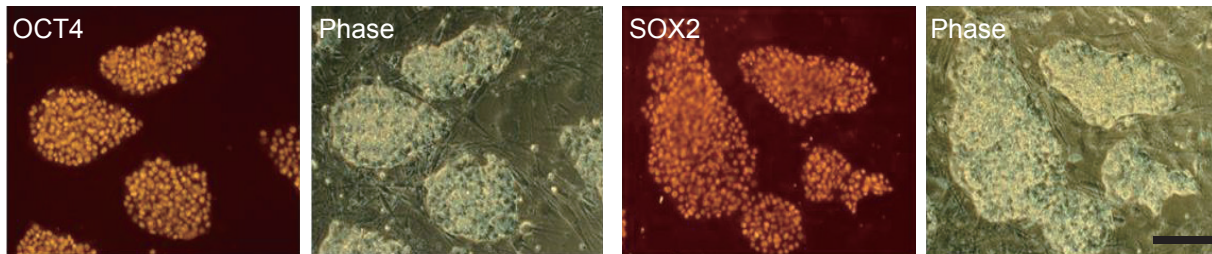

D

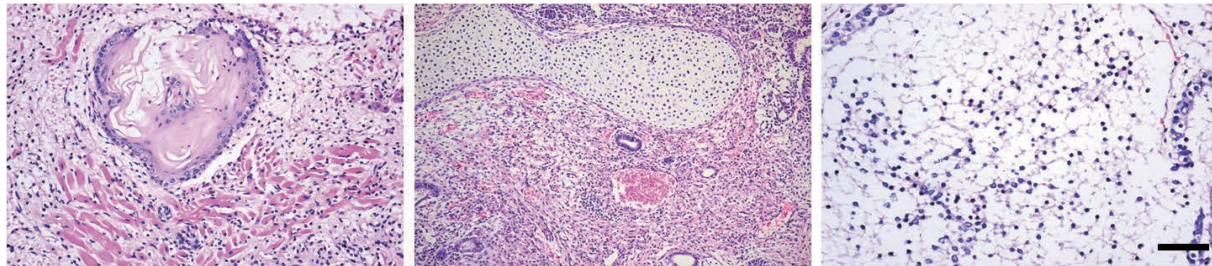

**Fig. S1. Derivation of pig iPSCs using the DOX-inducible system.**

- (A) Schematic representation of the DOX-inducible system for iPSC induction. The top is a *piggyBac* vector containing *OCT4-KLF4-SOX2-C-MYC* (*OSKM*) under control of the TRE3G promoter. The bottom is a *piggyBac* vector containing the reverse transactivator rtTA3G.
- (B) Timeline of reprogramming with the DOX-inducible system. Representative primary clones formed at day 7 after transfection. Pig iPSCs in 2i/LIF+DOX medium showed mouse ES-like tight three-dimensional clones at day 20. EF medium, serum-based embryonic fibroblast medium; ES medium, serum/LIF based ESC medium; 2i/LIF, serum-free ESC medium supplemented with PD0325901, CHIR90021, and LIF. Scale bar, 500  $\mu\text{m}$ .
- (C) Immunofluorescence staining of pluripotency markers, OCT4 and SOX2, in iPSCs cultured on irradiated mouse fibroblasts. Scale bar, 100  $\mu\text{m}$ .
- (D) Hematoxylin and eosin staining of paraffin sections of teratomas generated from porcine iPSC cells. Scale bar, 500  $\mu\text{m}$ .

Figure S2

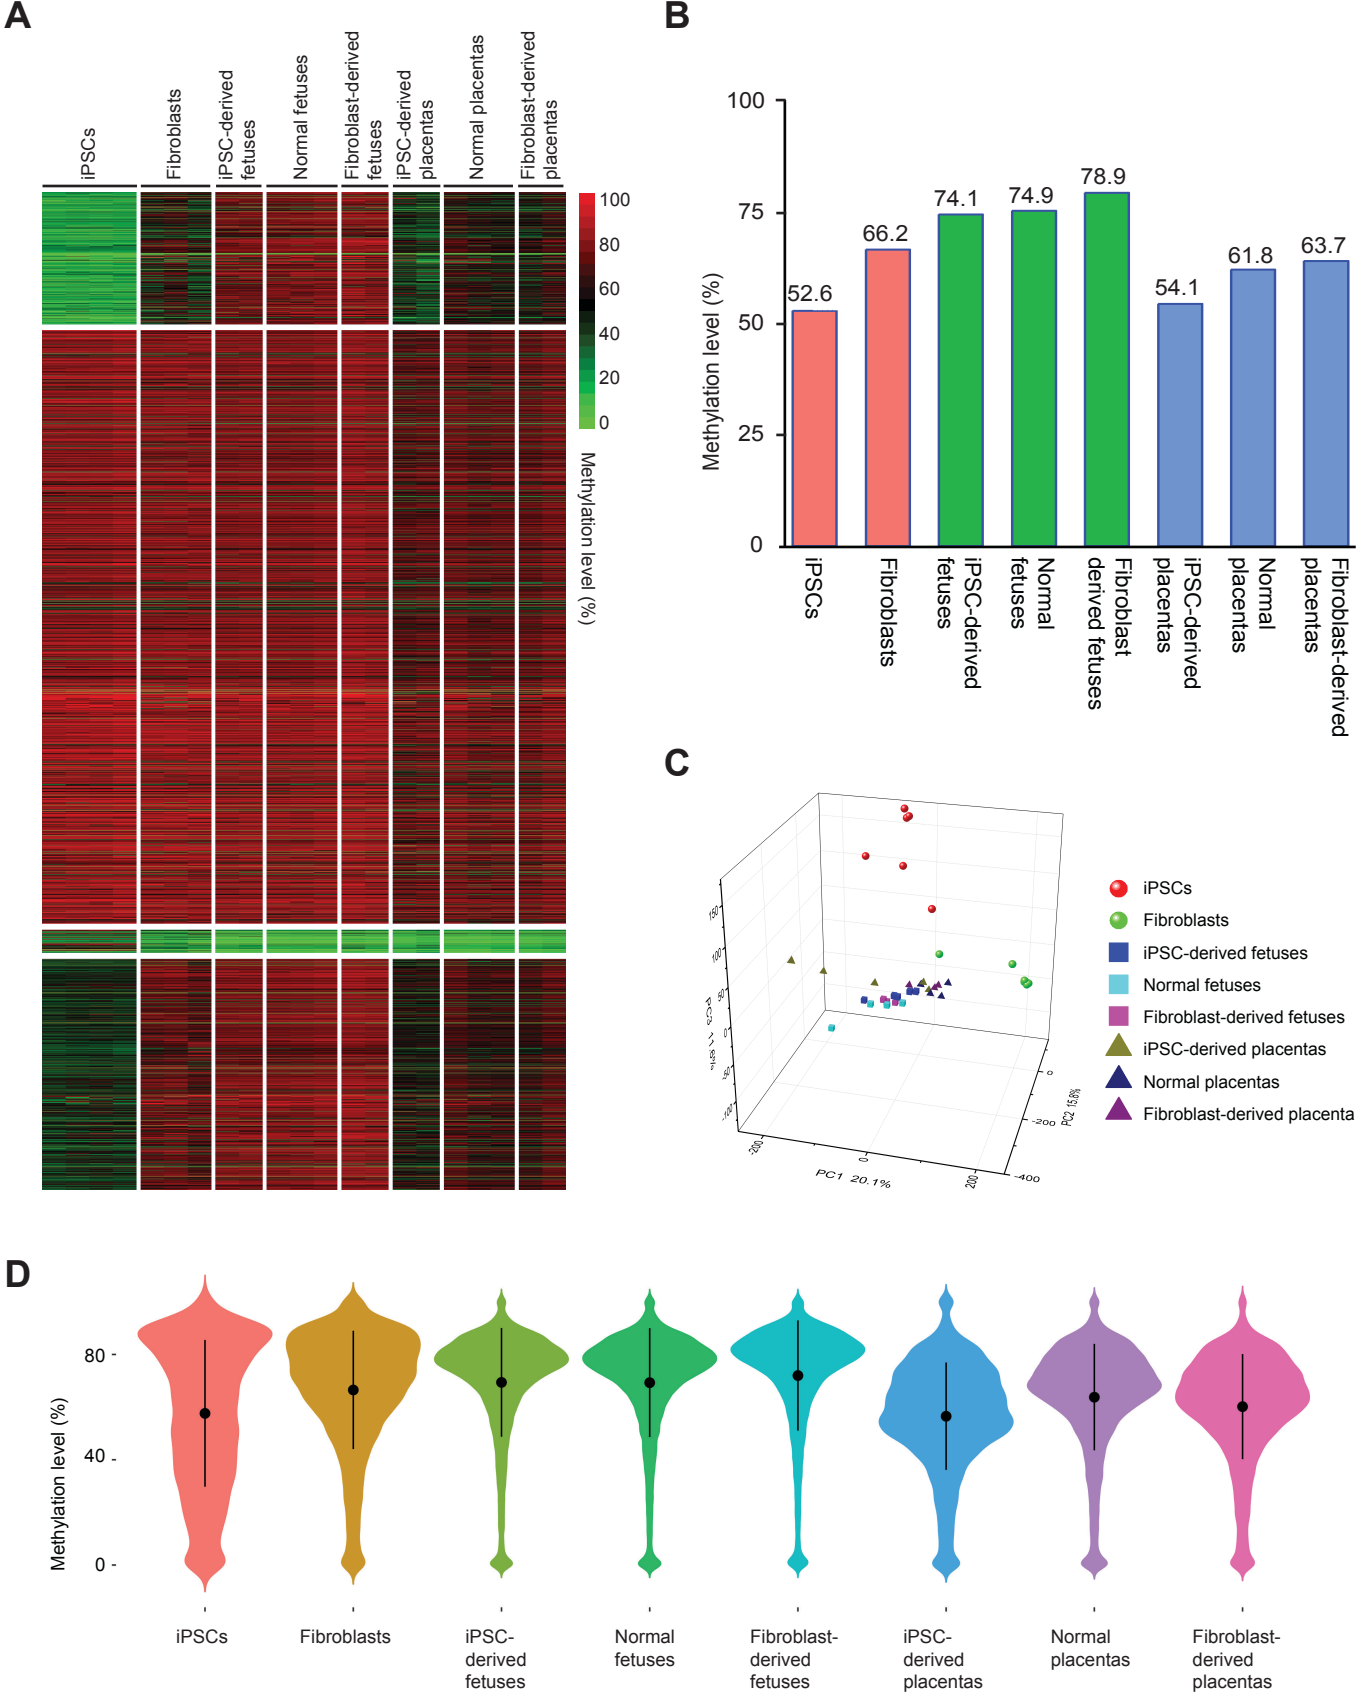

**Fig. S2. Patterns of the DNA methylome in pig nuclear transfer conceptuses.**

- (A) Clustered heat map showing the methylation pattern of all WGBS samples. Each line indicates the gene body methylation level for all pig Ensembl genes.
- (B) Bar plots of methylation level for different pig tissues. Each bar represents the average methylation level of all the CpG sites.
- (C) Principal component analysis (PCA) based on the gene expression of all samples. PCA 3D scatter plots were generated based on the gene expression (FPKM) of all genes in all lncRNA-seq porcine samples (including 6 iPSCs, 7 fibroblasts, 5 iPSC-derived fetuses, 3 fibroblast-derived fetuses, 4 normal fetuses, 5 iPSC-derived placentas, 3 fibroblast-derived placentas, 4 normal placentas). 47.5% of the total variance was explained by the first three PCs (PC1, 20.1%; PC2, 15.8%; PC3, 11.6%).
- (D) Violin plots for methylation level of all Ensembl genes in different pig tissues. The plots show the distribution for gene body methylation level of all genes in pig tissues. The methylation distribution difference is dramatically evened out after NT. The X-axis represents the probability density of the data at each methylation level. The mean and SD are indicated by the white dots and error bars.

Figure S3

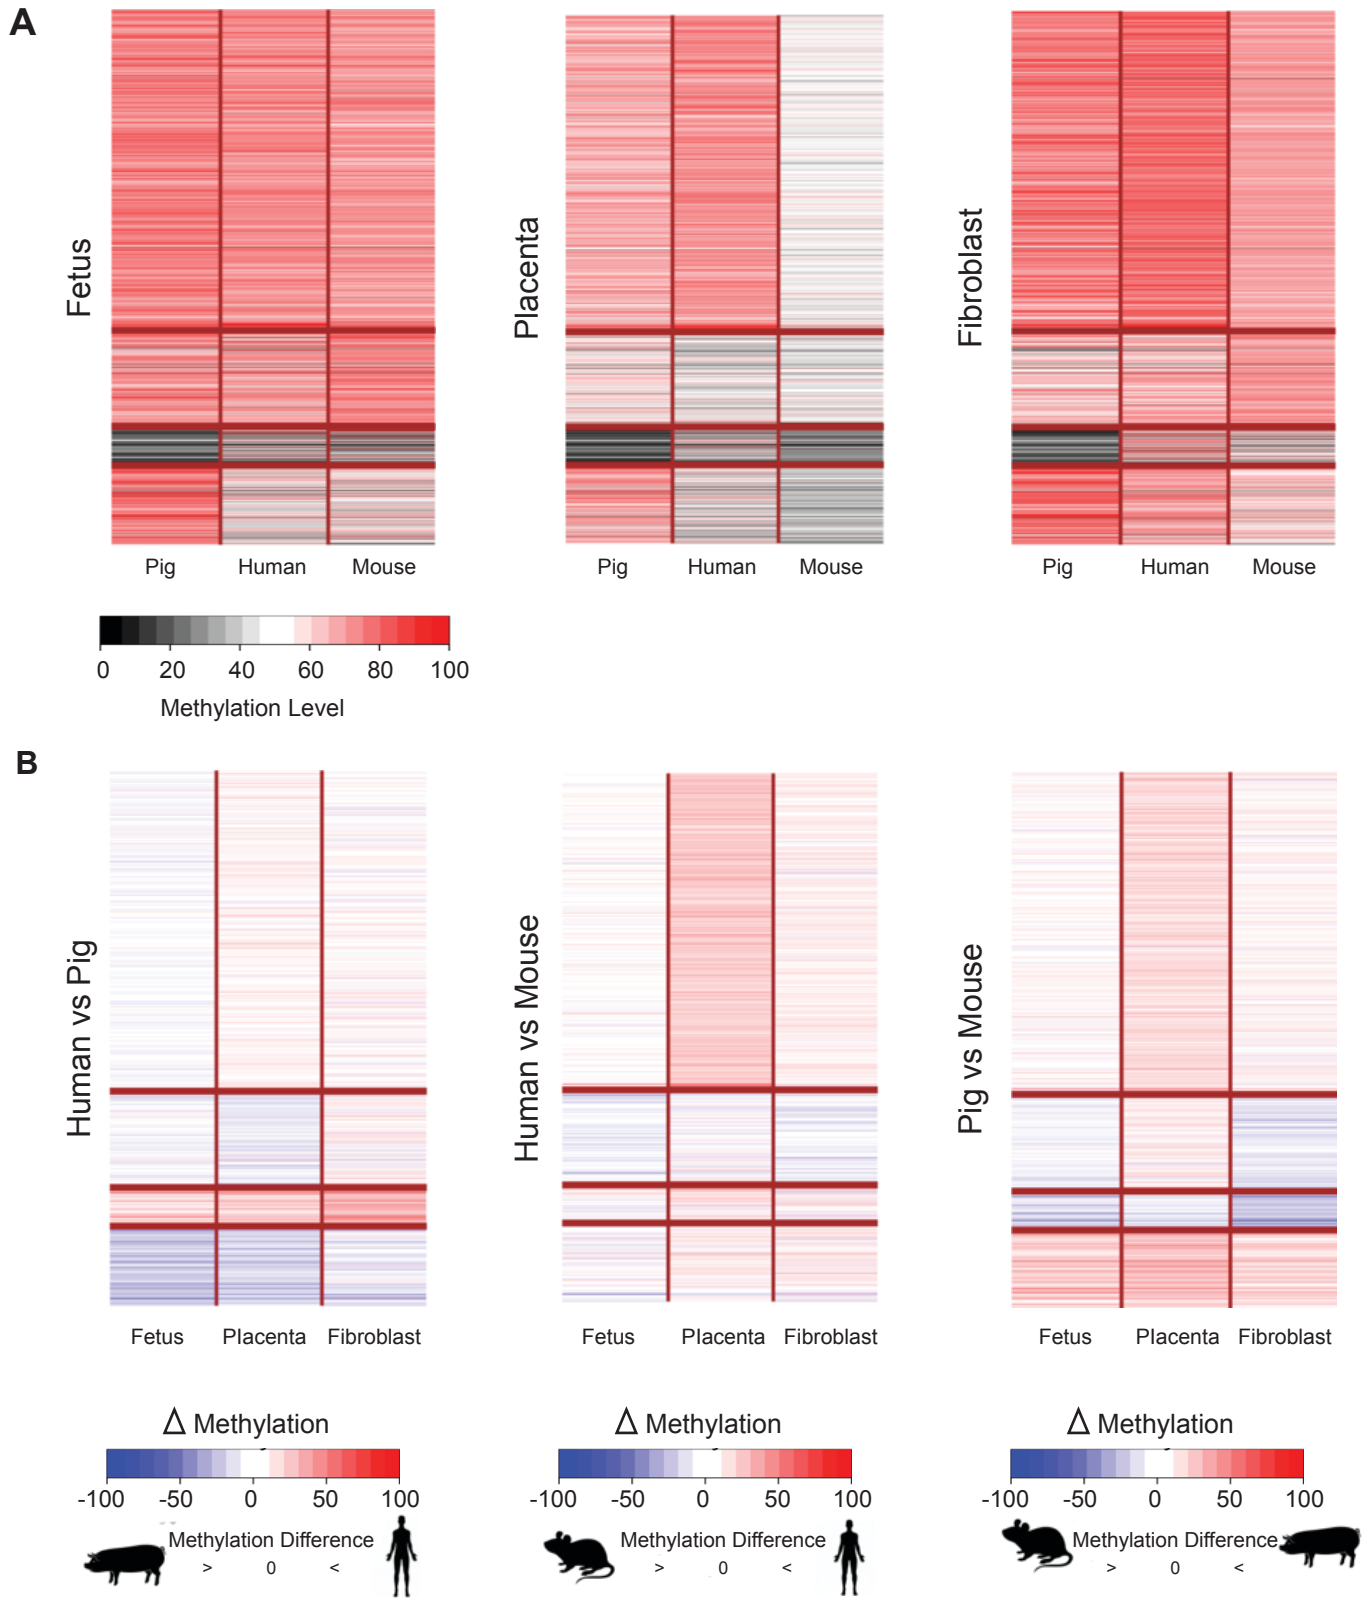

**Fig. S3. Global methylation patterns of pig genome are similar to human.**

- (A) Heat map for the methylation level of gene body clustered by tissue type in the pig with equivalent methylation values for orthologous sequences in mouse and human. The color keys from black to red indicate low to high methylation level.
- (B) The  $\Delta$  methylation heat map displays the difference in methylation from the cross-species comparison ( $\Delta$  methylation = right species – left species). The color keys from blue to red indicate hypomethylation to hypermethylation difference between two species.

Figure S4

### Differentially methylated regions

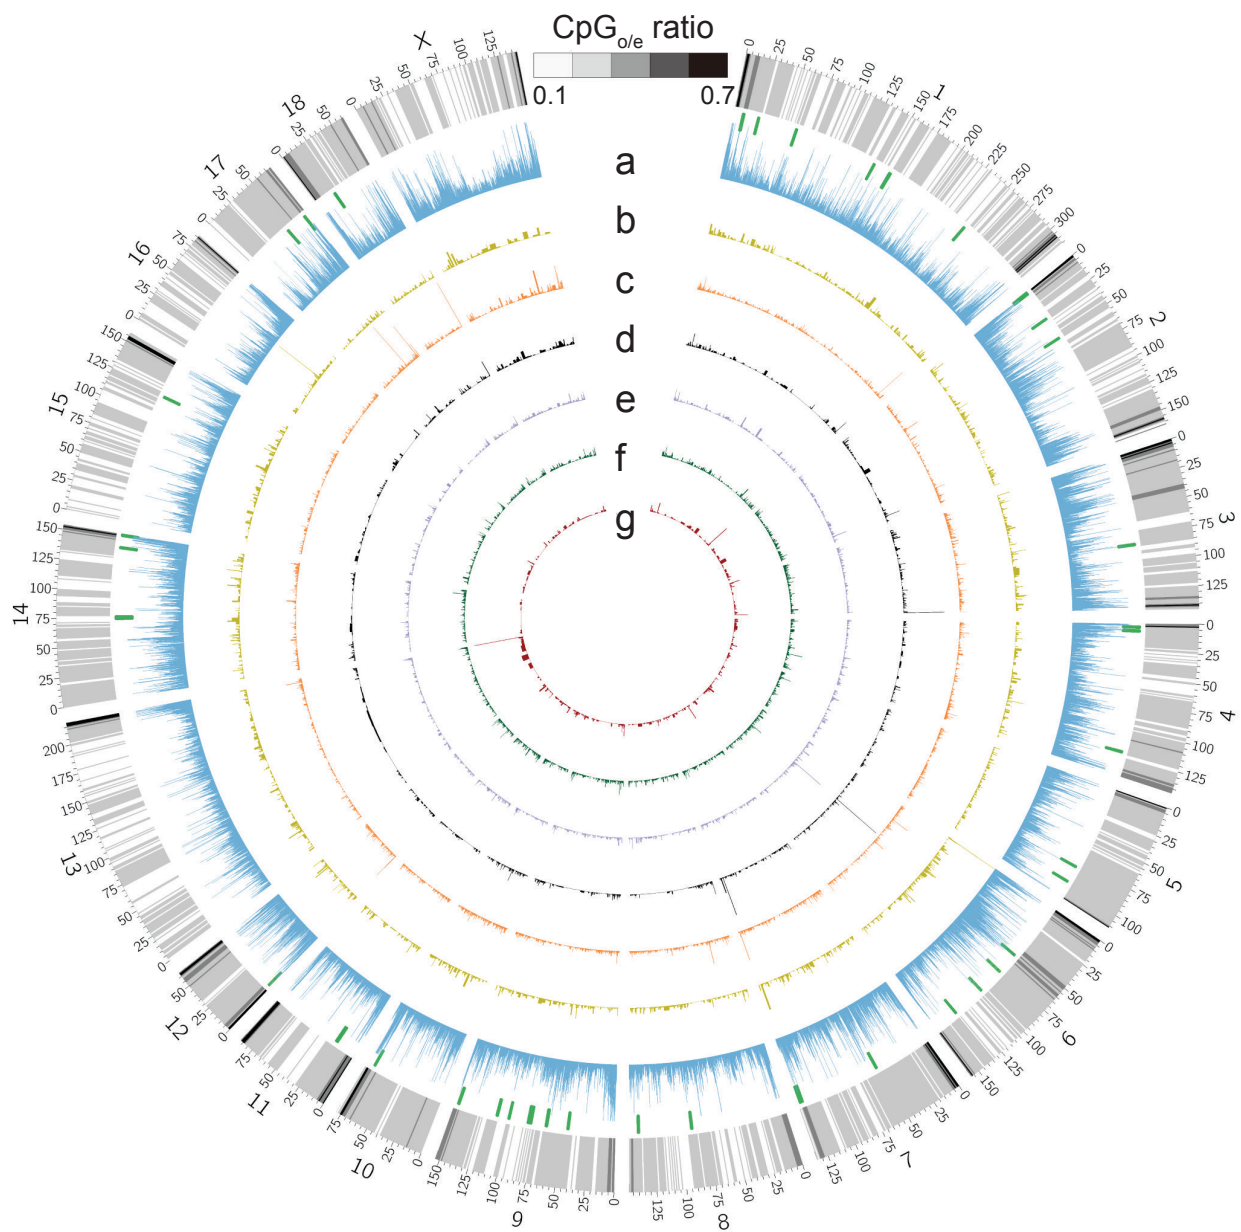

- a. Fibroblasts vs. iPSCs
- b. iPSC-derived fetuses vs. Normal fetuses
- c. iPSC-derived fetuses vs. Fibroblast-derived fetuses
- d. Fibroblast-derived fetuses vs. Normal fetuses
- e. iPSC-derived placentas vs. Normal placentas
- f. iPSC-derived placentas vs. Fibroblast-derived placentas
- g. Fibroblast-derived placentas vs. Normal placentas



**Fig. S4. An overall view of genome-wide distribution of pairwise DMRs.**

The outermost circle displays pig chromosomes and the CpGo/e ratio at 1 Mb bins. The second circle displays the 62 known and candidate imprinted loci (green). The third to ninth circles represent 9 categories of DMRs (a: Fibroblast vs. iPSC DMR, b: iPSC-derived fetus vs. Normal fetus, c: iPSC-derived fetus vs. Fibroblast-derived fetus, d: Fibroblast-derived fetus vs. Normal fetus, e: iPSC-derived placenta vs. Normal placenta, f: iPSC-derived placenta vs. Fibroblast-derived placenta, g: Fibroblast-derived placenta vs. Normal Placenta).

**Figure S5**

All candidate imprinted DMRs and imprinted genes identified in this study

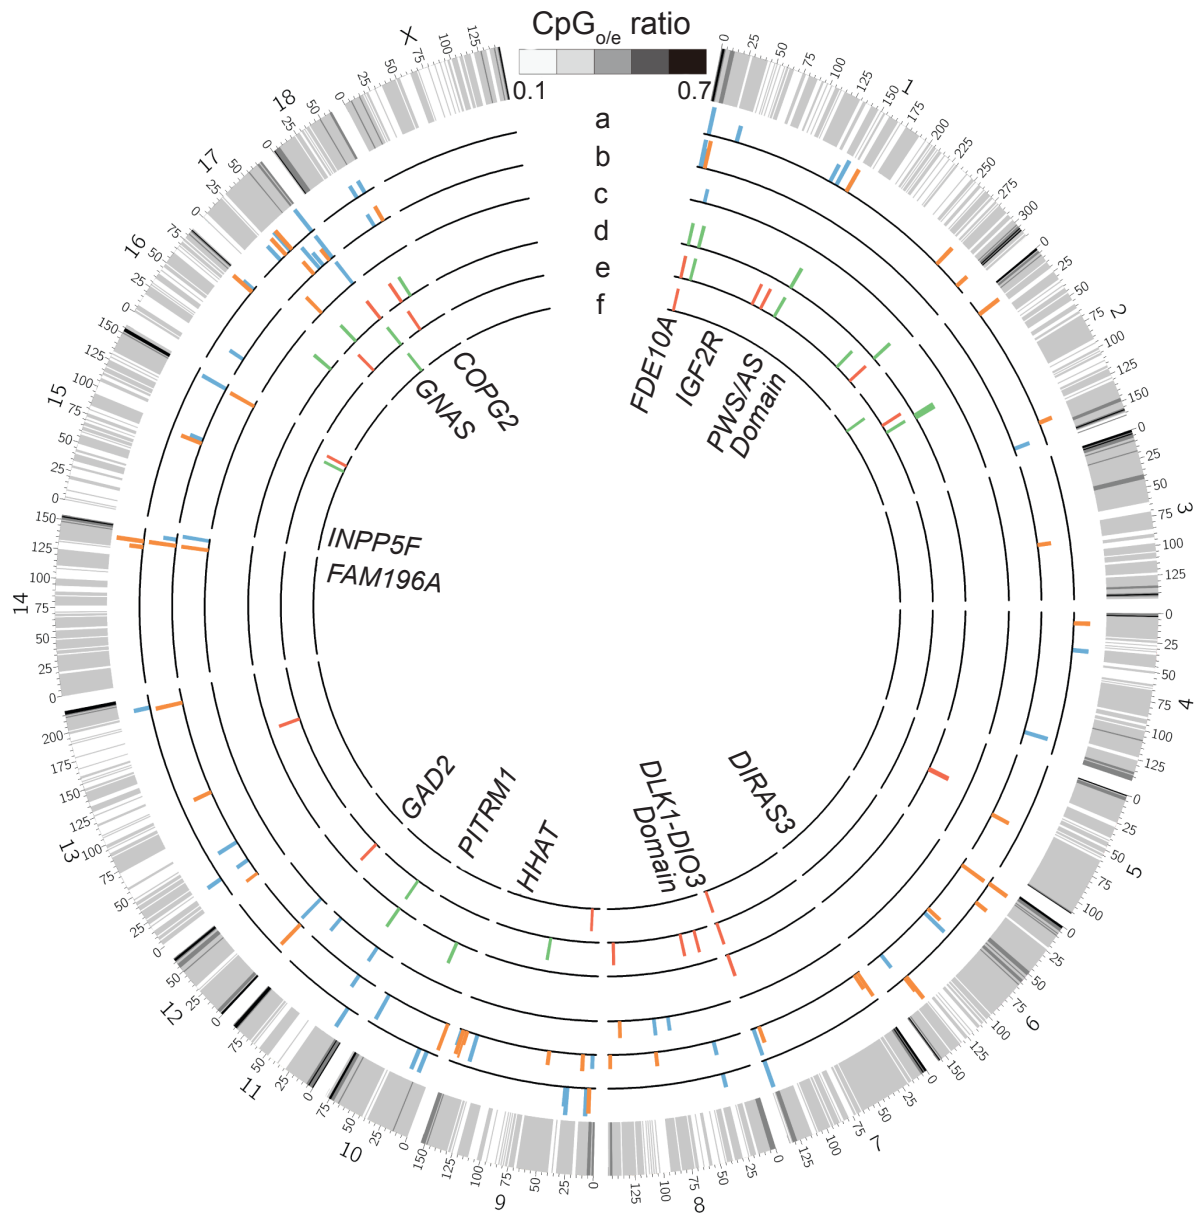

a. Fetus imprinted DMRs

d. Fetus imprinted genes

b. Placenta imprinted DMRs

e. Placenta imprinted genes

c. Fibroblast imprinted DMRs

f. Fibroblast imprinted genes

**Fig. S5. Circular representation of the genome-wide distribution of all candidate imprinted DMRs and imprinted genes identified in this study.**

The outermost circle displays pig chromosomes and the CpG observed/expected ratio (CpGo/e) in 1 Mb bins. The second to fourth circles represent 3 categories of imprinted DMRs (a: Fetus imprinted DMRs, b: Placenta imprinted DMRs, c: Fibroblast imprinted DMRs). The height of the histogram bins indicates the number of CpGs in the imprinted DMRs. Blue bars: DMRs with paternal methylation; Orange bars: maternal methylation. The fifth to seventh circles represent 3 categories of imprinted genes (d: Imprinted genes in Fetus, e: Imprinted genes in placenta, f: Imprinted genes in Fibroblast). Green ticks: imprinted genes with paternal expression; Red ticks: maternal expression. Imprinted genes are generally in cluster distribution and some examples of imprinted cluster are shown.

Figure S6

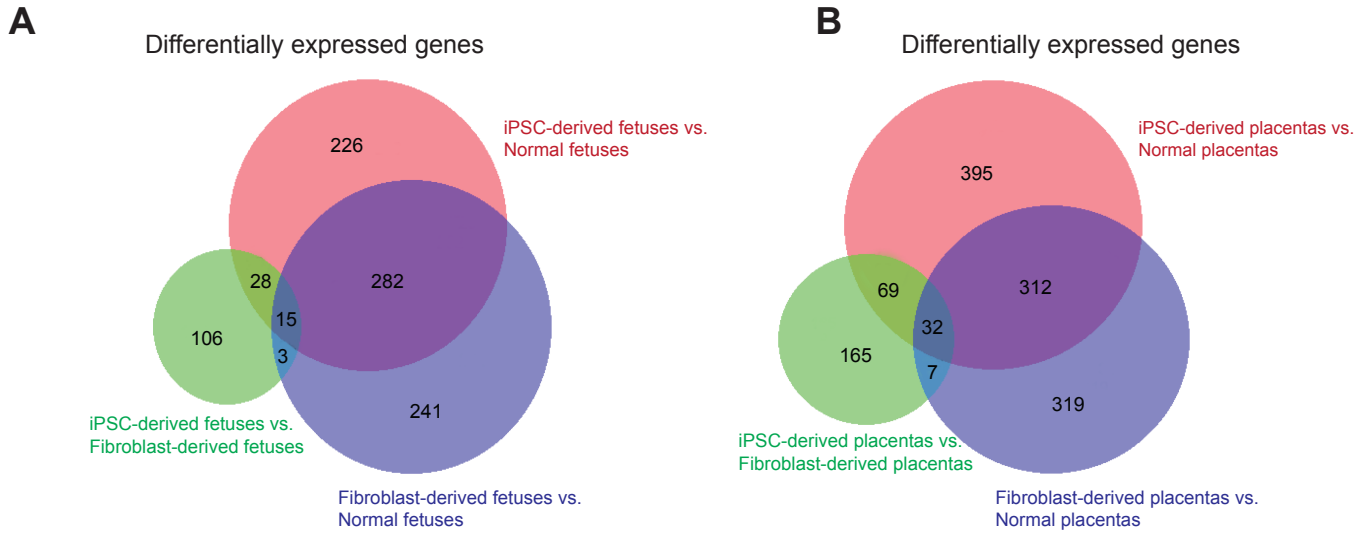

**Fig. S6. Differentially expressed genes in fetuses and placentas.**

**(A)** Venn diagram showing the overlap of DEGs (including coding genes and lncRNAs) detected by pairwise comparison among iPSC-derived fetus, fibroblast-derived fetus, and normal fetus.

**(B)** Venn diagram showing the overlap of DEGs (including coding genes and lncRNAs) detected by pairwise comparison among iPSC-derived placenta, fibroblast-derived placenta, and normal placenta.

Figure S7

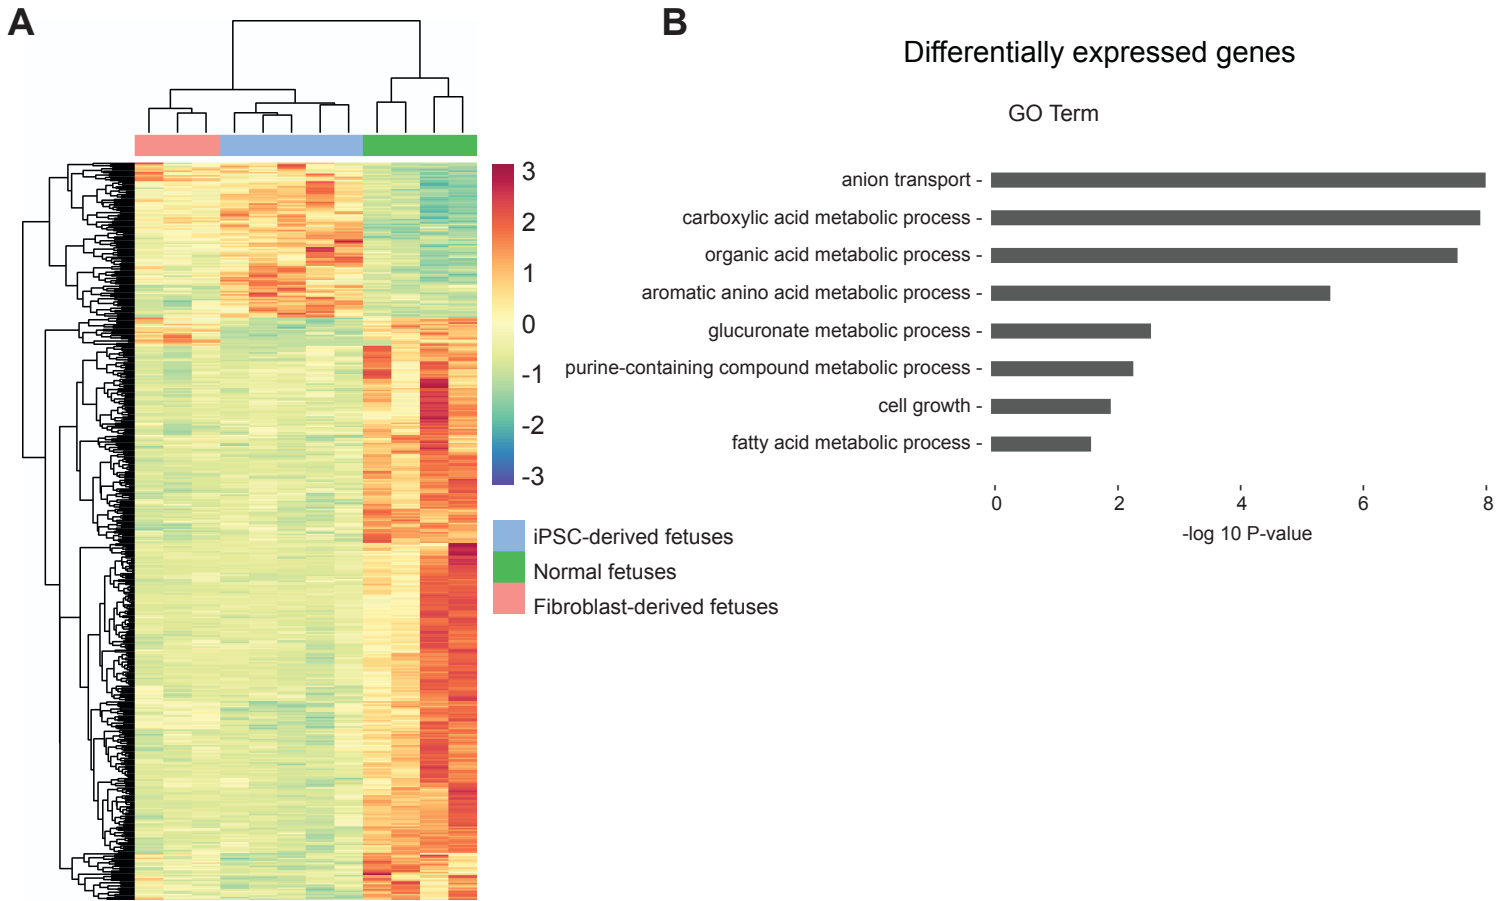

**Fig. S7. Analysis of (DEGs) between iPSC-derived fetuses and normal fetuses .**

- (A) Heat map represents the expression profiles of DEGs between iPSC-derived fetus and normal fetus (DESeq2 adjusted P value, 0.001). Genes were subjected to hierarchical clustering.
- (B) Gene ontology analysis of the DEGs between iPSC-derived fetus and normal fetus. The x-axis represents the negative log of the P values (classic Fisher's test) of the enrichment of the corresponding gene ontology terms.

Figure S8

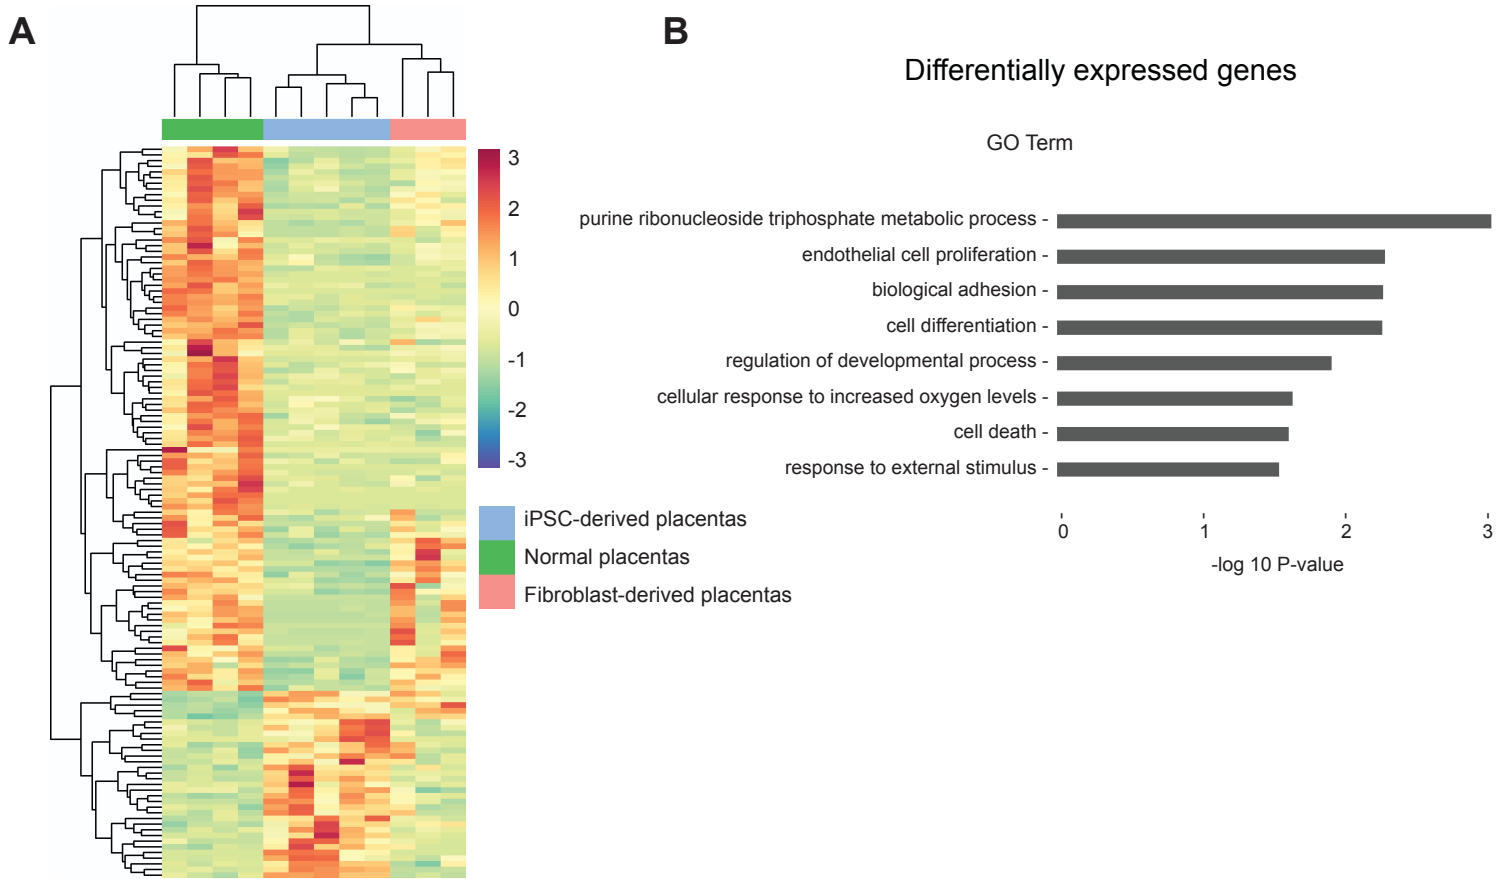



**Fig. S8. Analysis of (DEGs) between iPSC-derived placentas and normal placentas.**

**(A)** Heat map represents the expression profiles of DEGs between iPSC-derived placenta and normal placenta (DESeq2 adjusted P value, 0.001). Genes were subjected to hierarchical clustering.

**(B)** Gene ontology analysis of the DEGs between iPSC-derived placenta and normal placenta. The x-axis represents the negative log of the P values (classic Fisher's test) of the enrichment of the corresponding gene ontology terms.

Figure S9

Differentially methylated regions

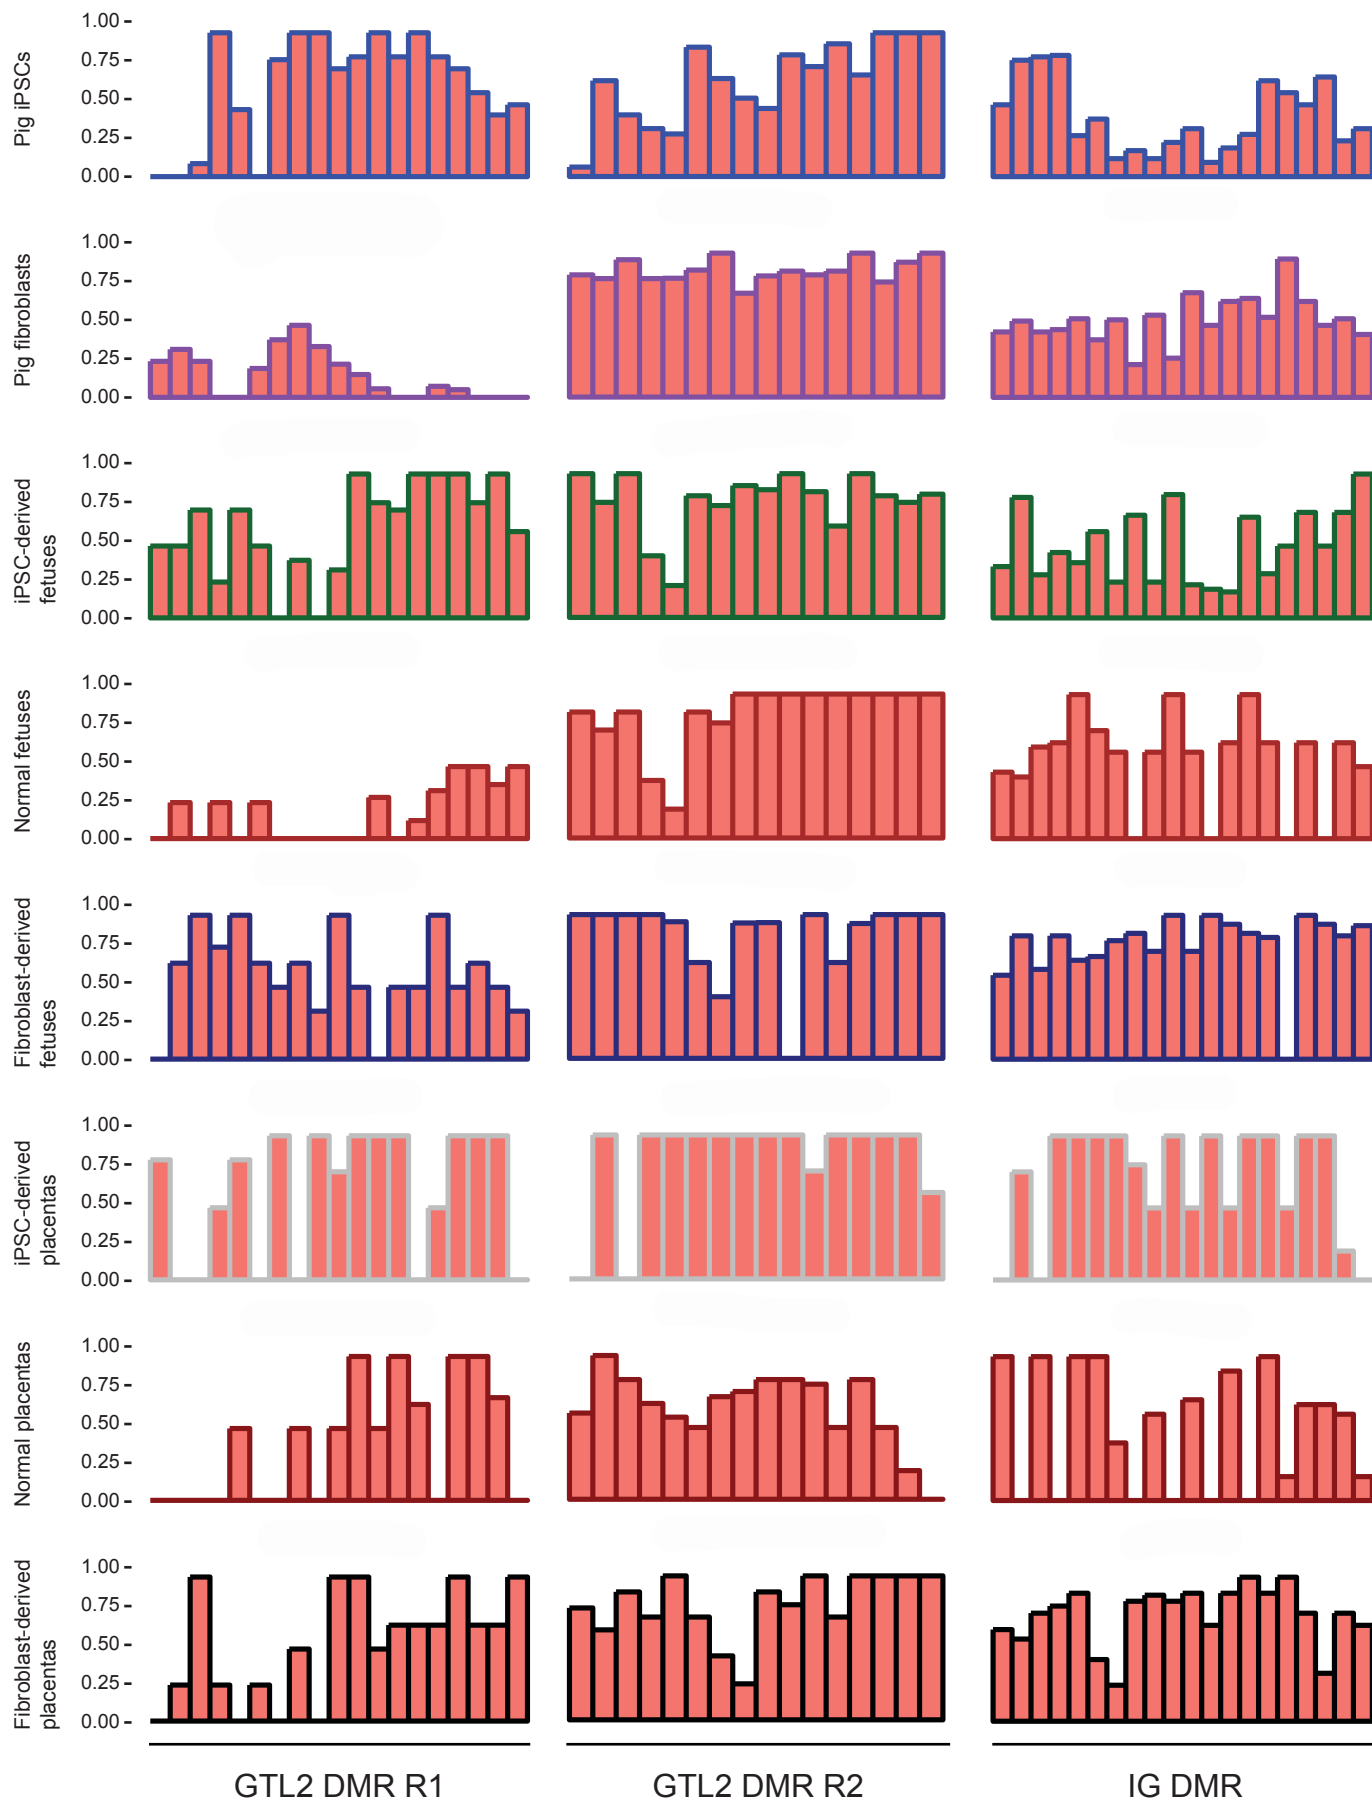

**Fig. S9. Distribution of methylation levels across the *IG-GTL2* DMR region in the pig genome.**

Each bar represents one CpG position, and the height shows the level of DNA methylation. The *GTL2* DMR R1 corresponds to the region Chr7: 132165384-132165582 in the pig genome. The *GTL2* DMR R2 corresponds to the region Chr7:132172903-132172954 in the pig genome. The *IG* DMR corresponds to the region Chr7: 132183855-132184138 in the pig genome. The iPSC-derived fetuses (placentas) show different levels of hypermethylation in the *GTL2* DMR and *IG* DMR.

Figure S10

A

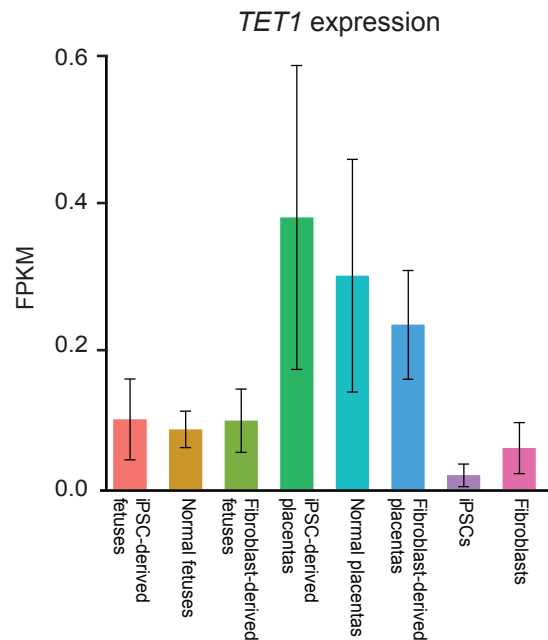

B

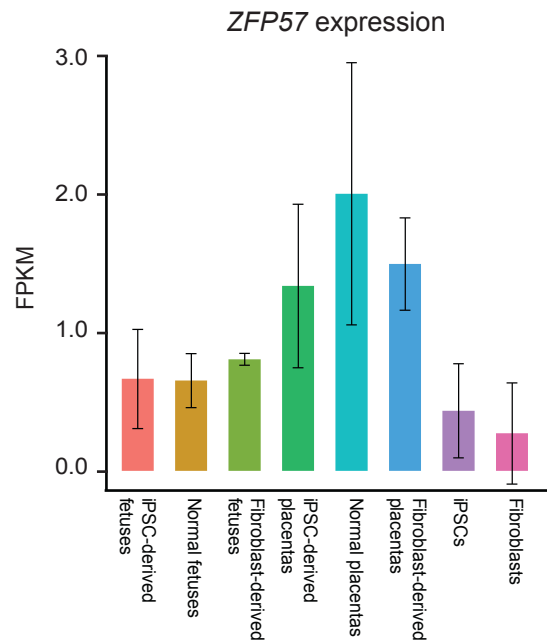

C

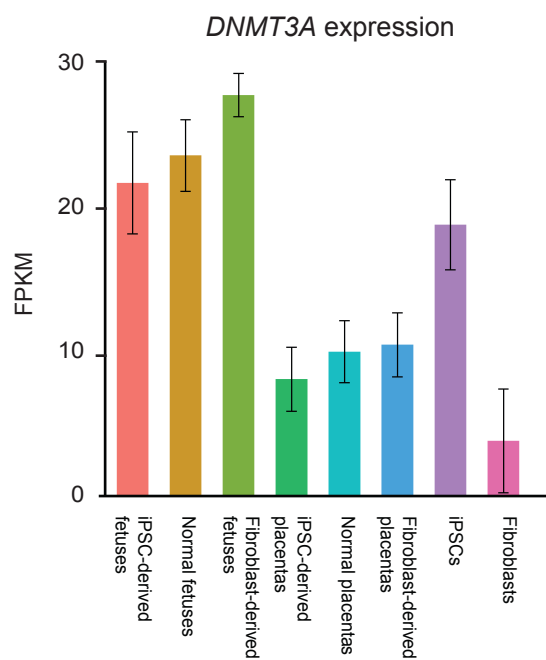

D

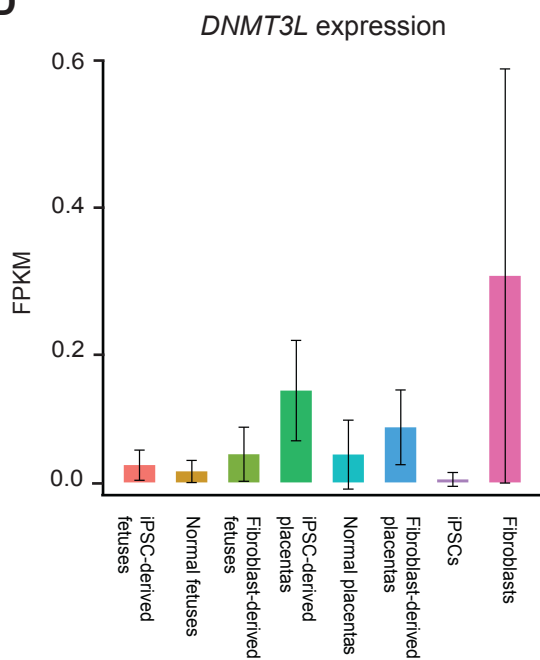

**Fig. S10. Analysis of possible upstream genes of *RTL1* in different tissues.**

**(A)** *TET1* expression in different tissues. No significant difference was detected between the iPSC-derived fetuses (placentas) and Normal fetuses (placentas).

**(B)** *ZNF57* expression in different tissues. No significant difference was detected between the iPSC-derived fetuses (placentas) and Normal fetuses (placentas).

**(C)** *DNMT3A* expression in different tissues. No significant difference was detected between the iPSC-derived fetuses (placentas) and Normal fetuses (placentas).

**(D)** *DNMT3L* expression in different tissues. No significant difference was detected between the iPSC-derived fetuses (placentas) and Normal fetuses (placentas).

Figure S11

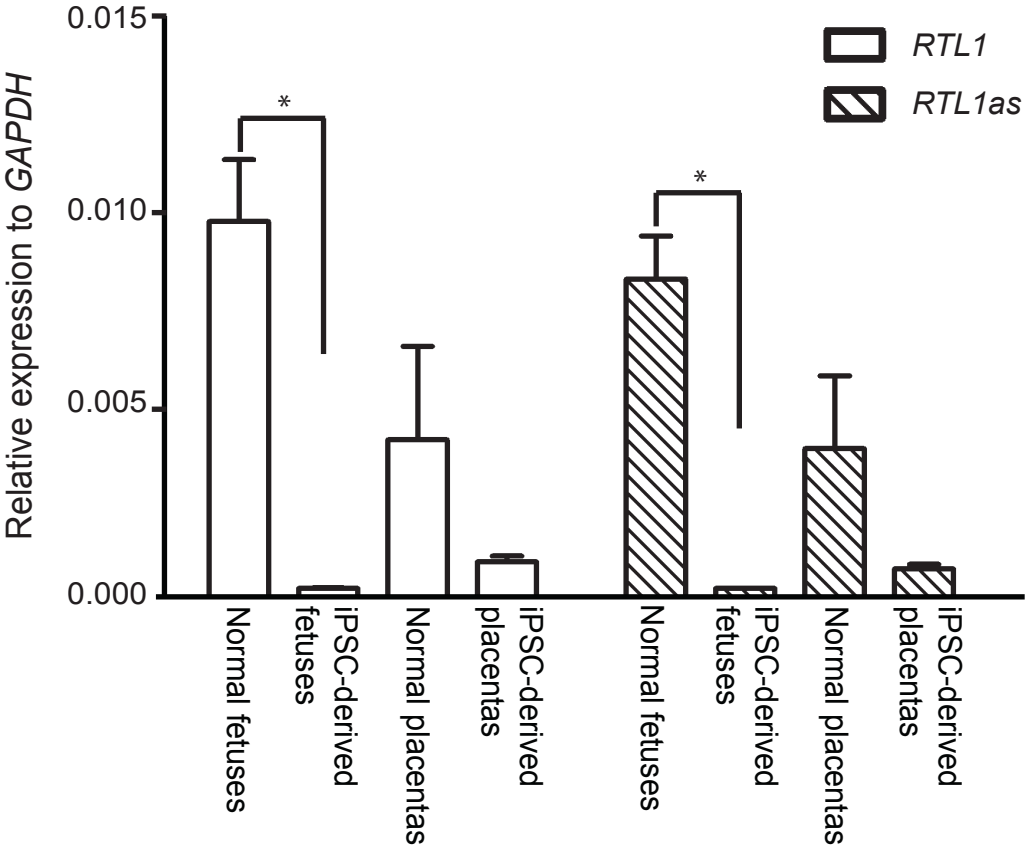

**Fig. S11 The expression of *RTL1* and *RTL1as* in Normal embryos and iPSC-derived embryos.**

Similar amounts of *RTL1* and *RTL1as* transcripts were detected in normal embryos and iPSC-derived embryos. The data were representative of three independent experiments (mean  $\pm$  SD). Statistical significance was analyzed by Student's t-test. \*,  $P < 0.05$ ; \*\*,  $P < 0.01$ ; \*\*\*,  $P < 0.001$ .

Figure S12

A

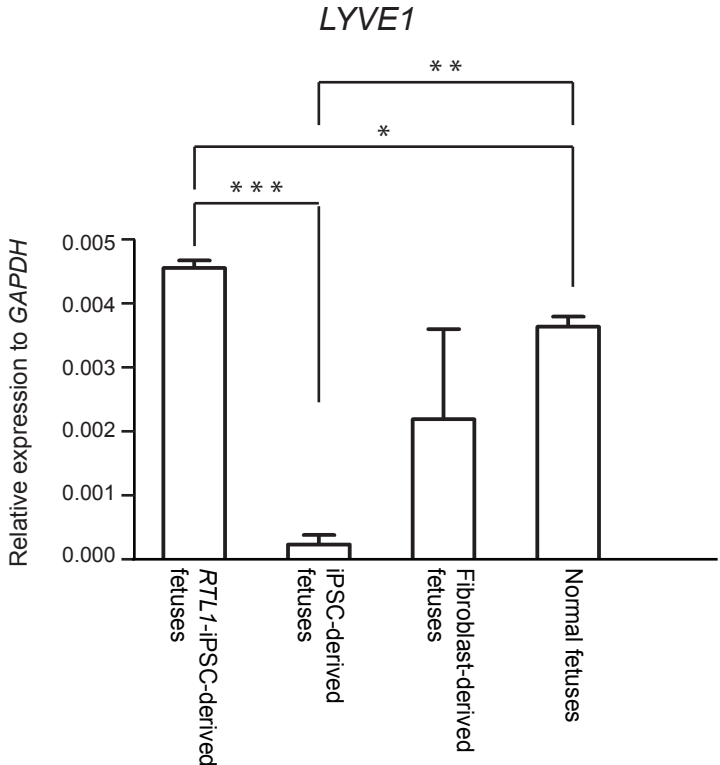

B

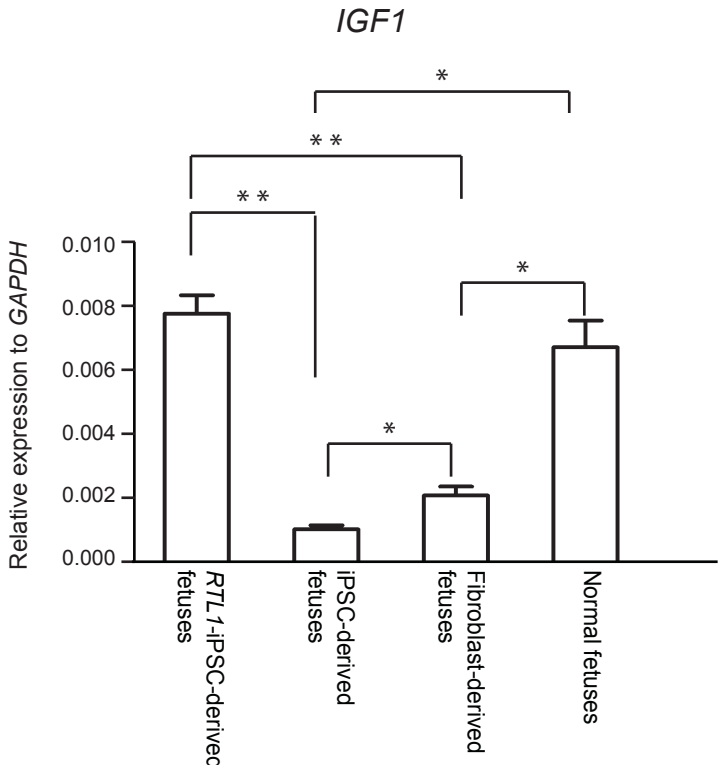



**Fig. S12. Analysis of downstream genes of *RTL1* in different tissues.**

(A) *LYVE1* expression in *RTL1*-iPSC-derived fetuses, iPSC-derived fetuses, fibroblast-derived fetuses and normal fetuses. The data were representative of three independent experiments (mean  $\pm$  SD). Statistical significance was analyzed by two-tail Student's t-test. \*,  $P < 0.05$ ; \*\*,  $P < 0.01$ ; \*\*\*,  $P < 0.001$ .

(B) *IGF1* expression in *RTL1*-iPSC-derived fetuses, iPSC-derived fetuses, fibroblast-derived fetuses and normal fetuses. The data were representative of three independent experiments (mean  $\pm$  SD). Statistical significance was analyzed by two-tail Student's t-test. \*,  $P < 0.05$ ; \*\*,  $P < 0.01$ ; \*\*\*,  $P < 0.001$ .

**Figure S13**

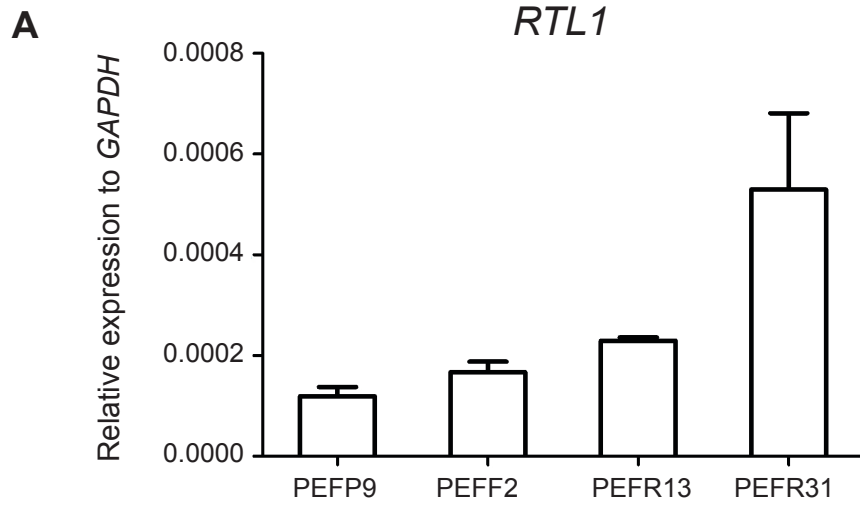

**B**

In vivo development of nuclear transfer embryos derived from fibroblasts

| Donor cells | NO. of transferred embryos | NO. of recipients | NO. of pregnancies |
|-------------|----------------------------|-------------------|--------------------|
| PEFP9       | 1230                       | 5                 | 0                  |
| PEFF2       | 1250                       | 4                 | 0                  |
| PEFR13      | 775                        | 3                 | 2                  |
| PEFR31      | 2895                       | 8                 | 5                  |

**Fig. S13. A positive correlation between the expression of *RTL1* and cloning efficiency in pig fibroblast.**

**(A)** The expression of *RTL1* in four fibroblast cell lines that have been showed different cloning efficiency. The data were representative of three independent experiments (mean  $\pm$  SD).

**(B)** *In vivo* development of nuclear transfer embryos derived from four fibroblast cell lines.

A positive correlation was shown between the expression of *RTL1* and cloning efficiency (Spearman Rank Correlation, 0.58).

**Figure S14**

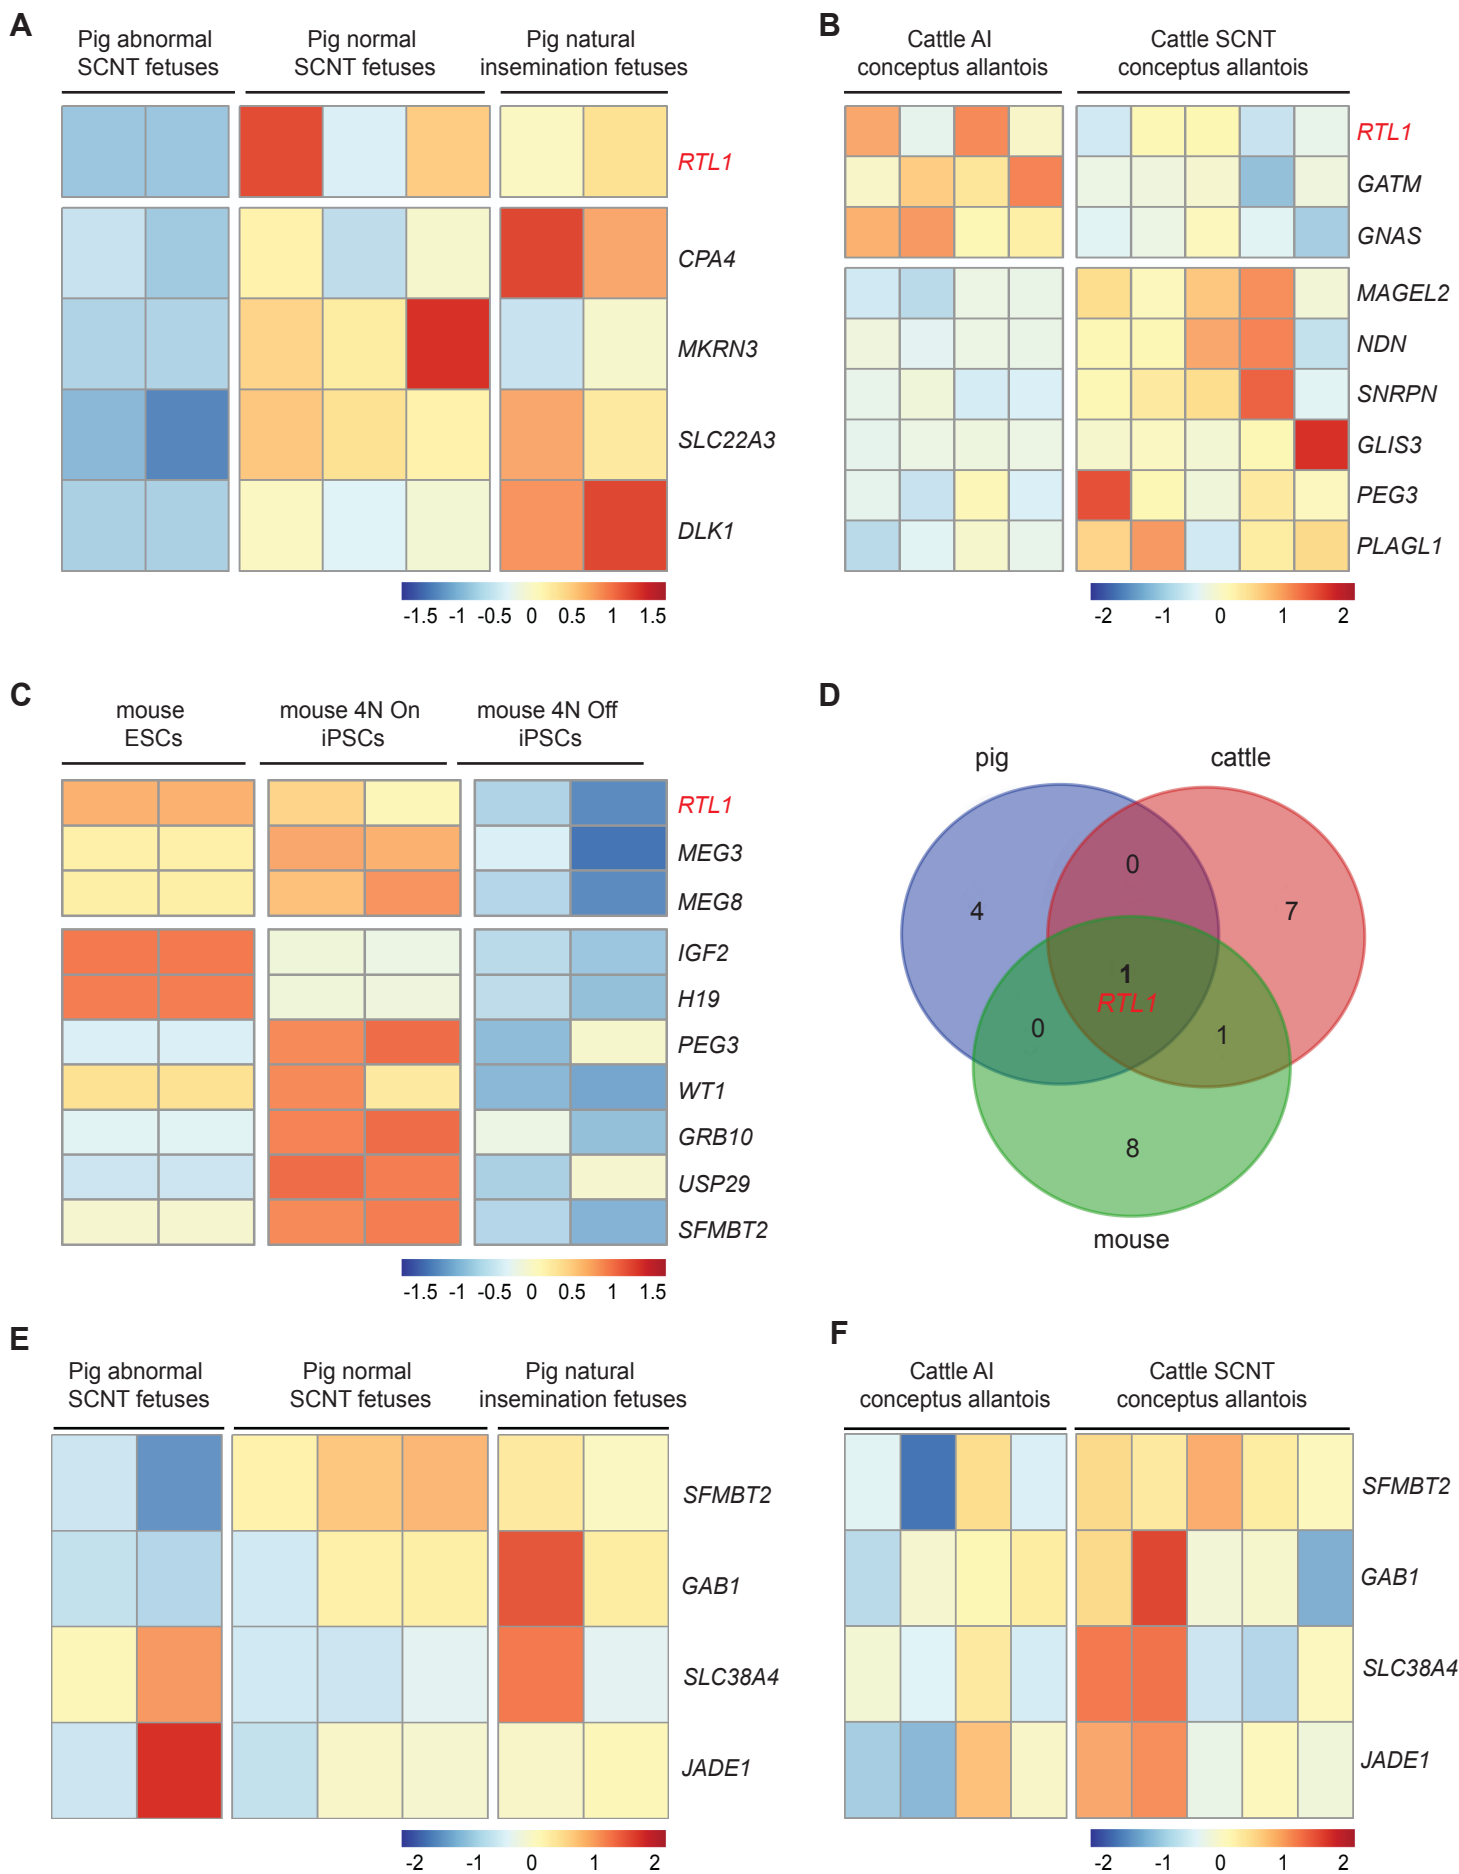

**Fig. S14. *RTL1* is the most frequent abnormally expressed gene among all aberrant imprinted genes across different species.**

- (A) Heat map represents the expression profiles of differentially expressed imprinted genes between the abnormal SCNT fetuses and normal fetuses in pigs. The heatmap is scaled by row. ( $P < 0.05$ , two-tailed Student's t-test).
- (B) Heat map represents the expression profiles of differentially expressed imprinted genes between SCNT conceptuses and four artificial insemination (AI) conceptuses in cattle (DESeq2 P value, 0.05). The imprinted gene in cattle was inferred from the homologous imprinted gene in the mouse.
- (C) Heat map represents the expression profiles of differentially expressed imprinted genes between 4N-competent iPSC and 4N-incompetent iPSC in mouse (DESeq2 adjusted P value, 0.1,  $\log_2$  fold change  $> 1$ ).
- (D) A Venn diagram shows the number of differentially expressed imprinted genes in panels A-C.
- (E) Heat map represents the expression profiles of four H3K27me3 dependent imprinted genes between the abnormal SCNT fetuses and normal SCNT fetuses in pigs. The heat map is scaled by row (two-tailed Student's t-test was performed on these genes between abnormal pig SCNT fetuses and normal SCNT fetuses. *SFMBT2*,  $P = 0.11$ ; *GABI*,  $P = 0.30$ ; *SLC38A4*,  $P = 0.66$ ; *JADE1*,  $P = 0.31$ ).
- (F) Heat map represents the expression profiles of four H3K27me3 dependent imprinted genes

between NT conceptuses and four artificial insemination (AI) conceptuses in cattle (Statistical tests were conducted with DESeq2 P value. *SFMBT2*, P = 0.093; *GABI*, P = 0.68; *SLC38A4*, P = 0.36; *JADE1*, P = 0.31). The four H3K27me3 dependent imprinted genes were inferred from the homologous imprinted genes in the mouse.

**Figure S15**

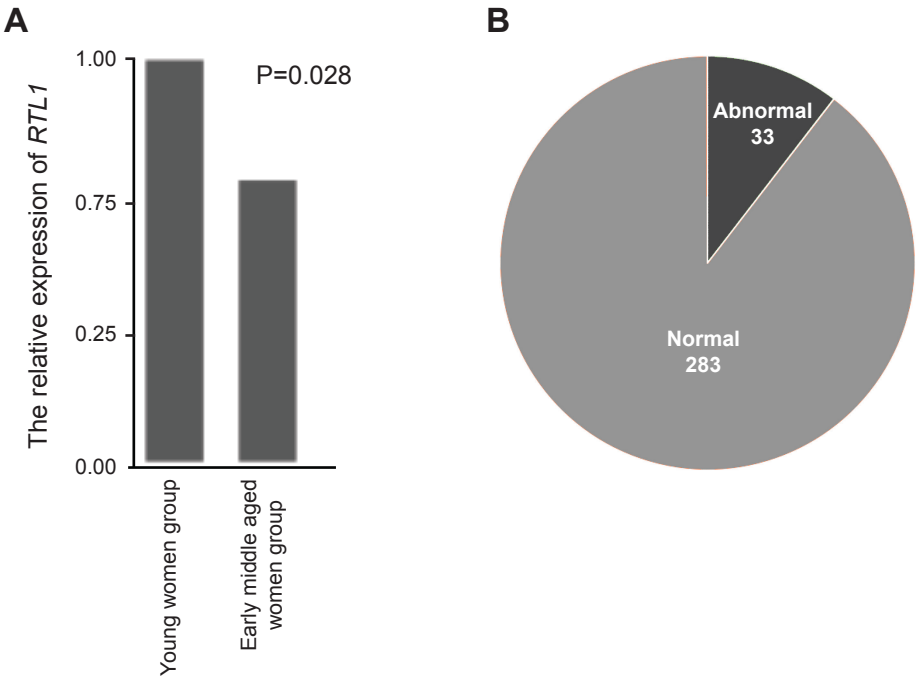

**Fig. S15. Analysis of data in previous studies shows a correlation of low *RTL1* expression and human fertility problems.**

- (A)** The relative expression of *RTL1* in human 1<sup>st</sup> trimester placental chorionic villi with different maternal age. The young women group includes placentas from women of 18, 19, 21 and 24 years, and the early middle-aged women group includes placentas from women of 27, 30, 32 and 33 years. The expression of *RTL1* was scaled according to gene expression in the young women group.
- (B)** The occurrence of abnormal methylation at *GTL2* DMR in the sperm from male patients with fertility problems.



**Figure S16**

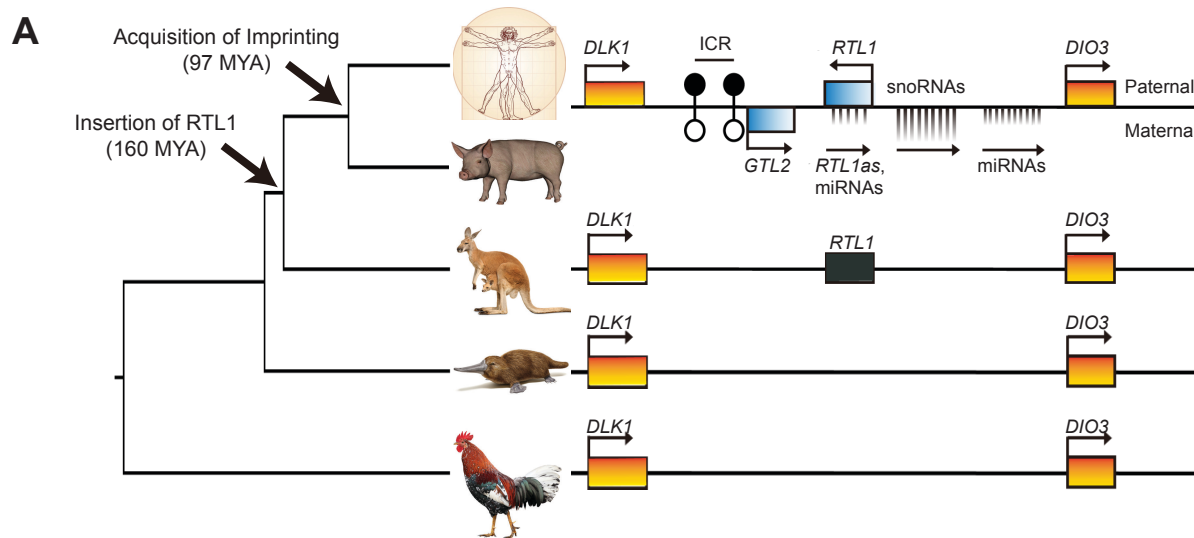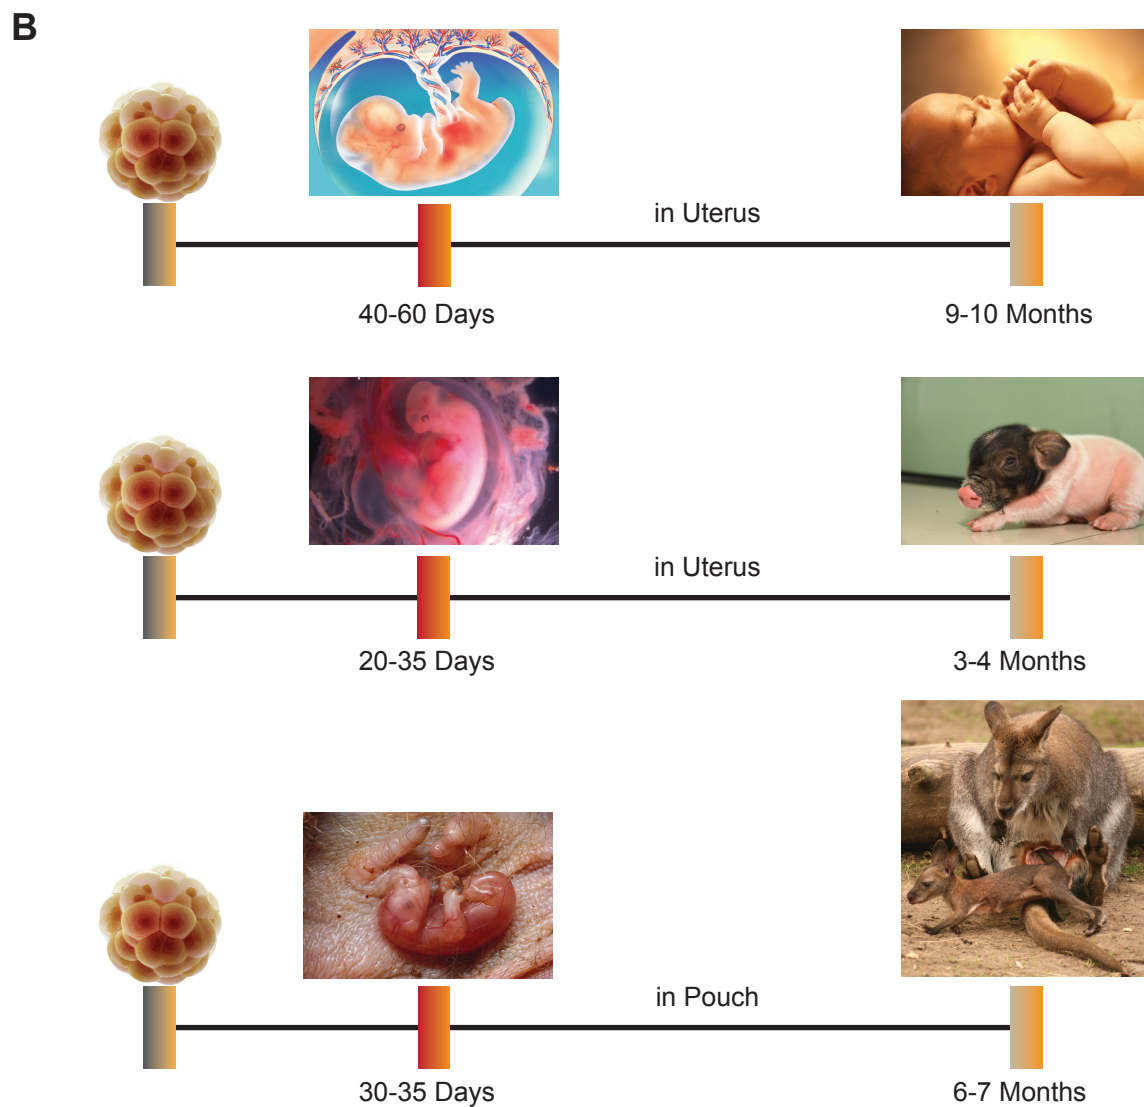

**Fig. S16. *RTL1* holds an important status in mammalian evolution.**

- (A) A phylogenetic tree of five vertebrates. The main evolutionary events are marked (MYA, million years ago). The right panel is a schematic representation of the *DLK1-DIO3* domain in human, pig, wallaby, platypus, and chicken showing evolutionary changes in the locus. *RTL1* was inserted into the domain in the common ancestor of wallaby, pig and human and then became imprinted and functional in Eutheria (human and pig), accompanied by the acquisition of imprinting control regions (ICR). The imprinting control region for the domain is the paternally methylated *IG-DMR* and *GTL2-DMR*. Filled circles, methylated; open circles, unmethylated.
- (B) Schematic of full-term pregnancy in human, pig, and wallaby. Normally, if the eutherian embryo establishes a fetomaternal interface at the indicated stages, it can survive to term. Otherwise, the embryo is resorbed early. In the wallaby, embryos develop in the pouch and do not require formation of the fetal-maternal connection after 30-35 days in uterus development.

**Table S1. Comparison of in vivo development of cloned and normal pig embryos**

| Embryo source               | No. of transferred embryos | No. of recipients | No. of pregnancies              |                                 |                                 |                                 | No. of live piglets           |
|-----------------------------|----------------------------|-------------------|---------------------------------|---------------------------------|---------------------------------|---------------------------------|-------------------------------|
|                             |                            |                   | GD25                            | GD45                            | GD60                            | full term                       |                               |
| Natural fertilized embryos  | -                          | 10                | 9<br>(91.6±14.4%) <sup>a</sup>  | 9<br>(91.6±14.4%) <sup>a</sup>  | 9<br>(91.6±14.4%) <sup>a</sup>  | 9<br>(91.6±14.4%) <sup>a</sup>  | 66                            |
| Fibroblasts-derived embryos | 5307                       | 20                | 15<br>(73.6±12.0%) <sup>a</sup> | 14<br>(68.1±18.8%) <sup>b</sup> | 14<br>(68.1±18.8%) <sup>b</sup> | 14<br>(68.1±18.8%) <sup>b</sup> | 69<br>(1.2±0.4%) <sup>a</sup> |
| iPSC-derived embryos        | 2959                       | 16                | 5<br>(31.1±10.2%) <sup>b</sup>  | 1<br>(5.6±9.6%) <sup>c</sup>    | 1<br>(5.6±9.6%) <sup>c</sup>    | 0(0) <sup>c</sup>               | 0(0) <sup>b</sup>             |

<sup>a,b,c</sup> Values with different superscripts represent significant differences of pregnancy rate within the same column (P < 0.05).
